# Supplementary material for: A glycerol triglycidyl ether cross-linker assisting an in situ thermally polymerized gel polymer electrolyte for advanced lithium metal batteries
Source: Royal Society of Chemistry journal article supplement (doi:10.1039/d4nj01484g), 2024-01-01
Supplement: d4nj01484g1.pdf [file d4nj01484g1.pdf]

## Supporting Information

Glycerol triglycidyl ether crosslinker assisting in situ thermally  
polymerized gel polymer electrolyte for advanced lithium metal batteries

Hao Huang<sup>a,b</sup>, Linyun Yi<sup>a,b</sup>, Xiaoxiao Chen<sup>a,b</sup>, Chaohui Wei<sup>a</sup>, Aijun Zhou<sup>a,b</sup>, Yuehui  
Wang<sup>b,c</sup>, Jingze Li<sup>a,b\*</sup>

<sup>a</sup> Huzhou Key Laboratory of Smart and Clean Energy, Yangtze Delta Region Institute  
(Huzhou), University of Electronic Science and Technology of China, Huzhou  
313001, P. R. China

<sup>b</sup> School of Materials and Energy, University of Electronic Science and Technology  
of China, Chengdu 611731, P. R. China

<sup>c</sup> College of Chemistry and Biology, Zhongshan Institute, University of Electronic  
Science & Technology of China, Zhongshan, 528402, P. R. China.

Corresponding author E-mail: [lijingze@uestc.edu.cn](mailto:lijingze@uestc.edu.cn) (J. Z. Li)

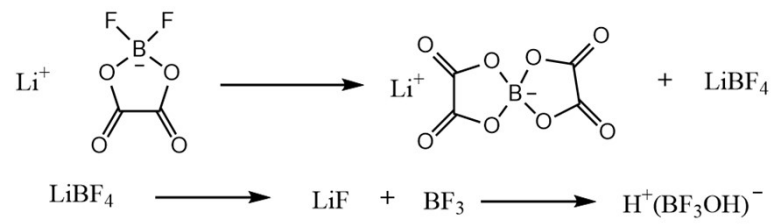

Fig. S1. Schematic diagram of thermal decomposition of LiDFOB

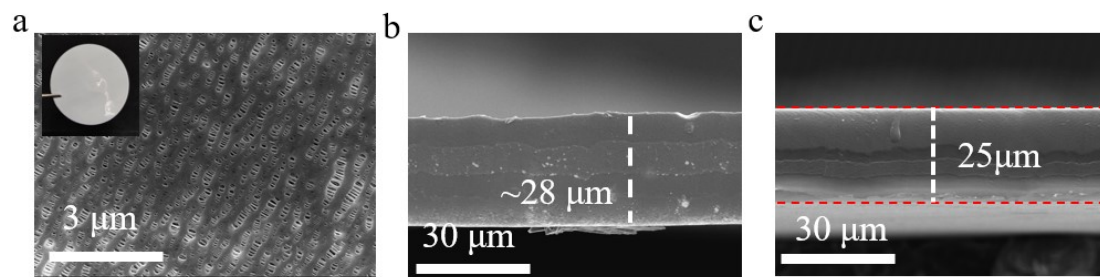

Fig. S2. (a) Top-view SEM image of a commercial separator sheet. The inset is a photograph. Cross-sectional SEM images of (b) PDOL-FEC-GTE and (c) the commercial separator.

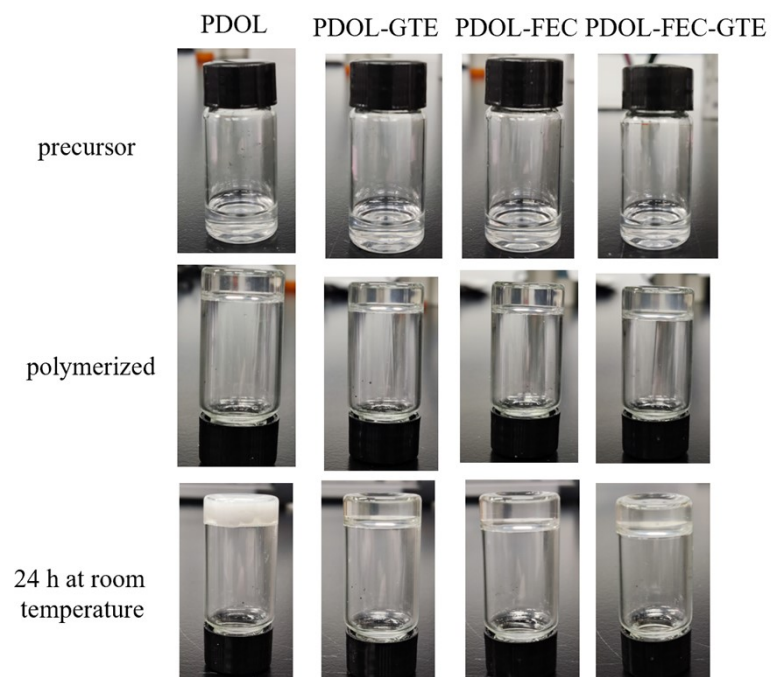

Fig. S3. Photographs of in situ polymerized precursor solutions at different states.

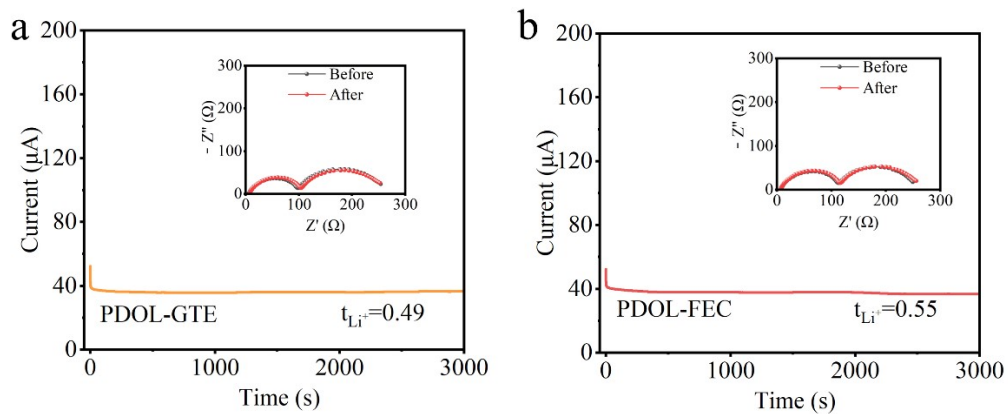

Fig. S4 Chronoamperometry curves of (a) PDOL-GTE and (b) PDOL-FEC. The insets show the EIS plots before and after polarization.

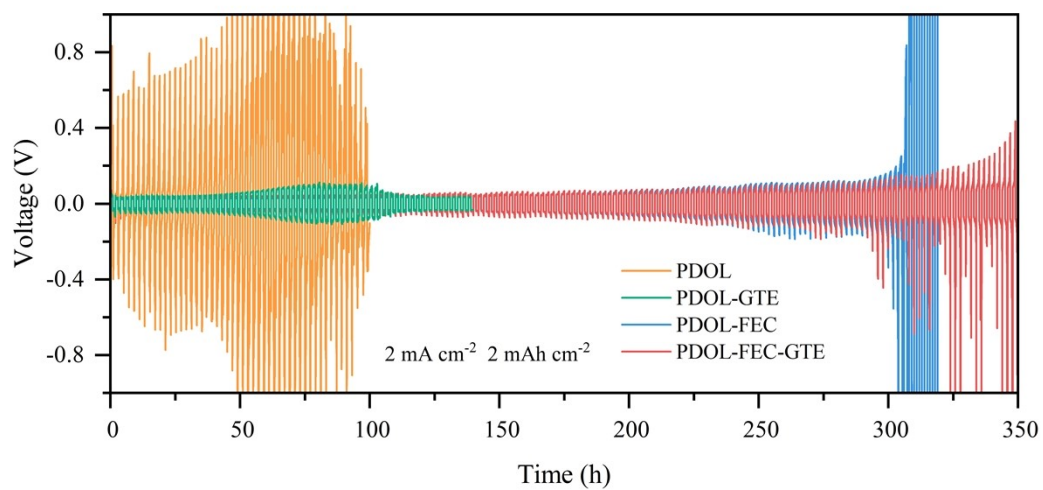

Fig. S5 Voltage profiles of Li||Li symmetrical cells that contain different electrolytes in room temperature at 2 mA cm<sup>-2</sup> and 2 mAh cm<sup>-2</sup>.

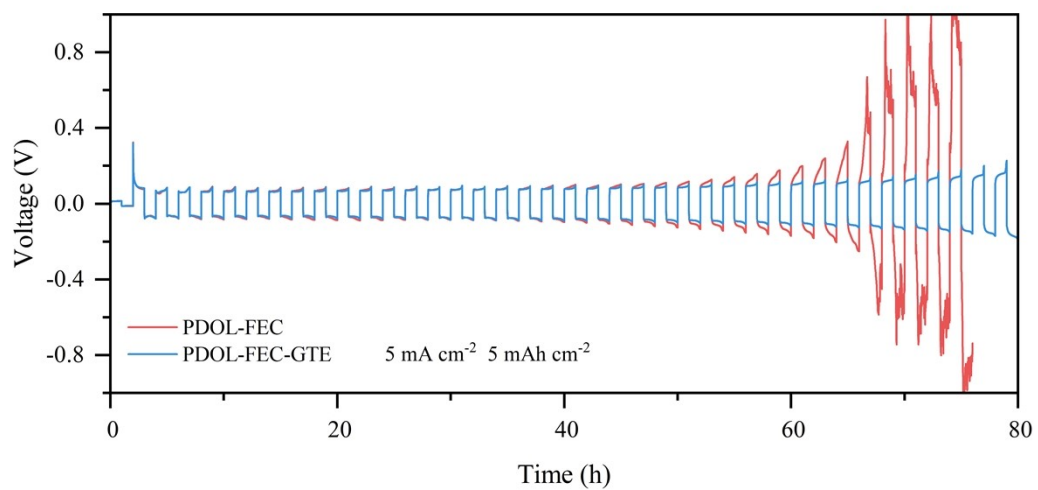

Fig. S6 Voltage profiles of Li||Li symmetrical cells that contain different electrolytes in room temperature at  $5 \text{ mA cm}^{-2}$  and  $5 \text{ mAh cm}^{-2}$ .

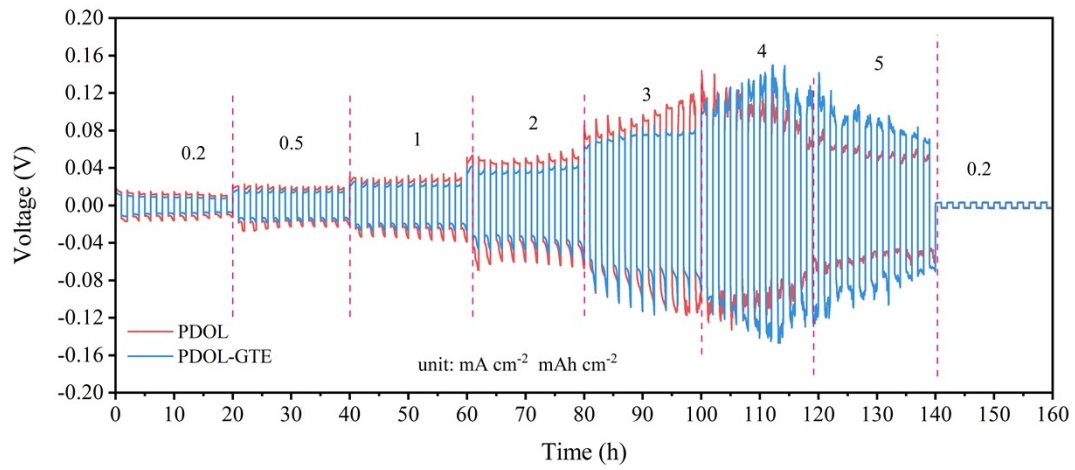

Fig. S7. Voltage profiles of Li||Li cells at PDOL and PDOL-GTE



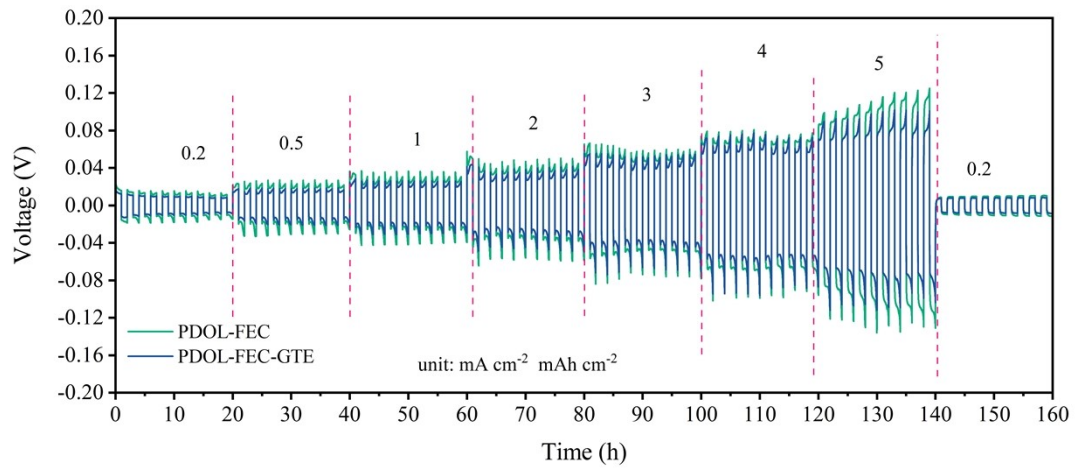

Fig. S8. Voltage profiles of Li||Li cells at PDOL-FEC and PDOL-FEC-GTE.

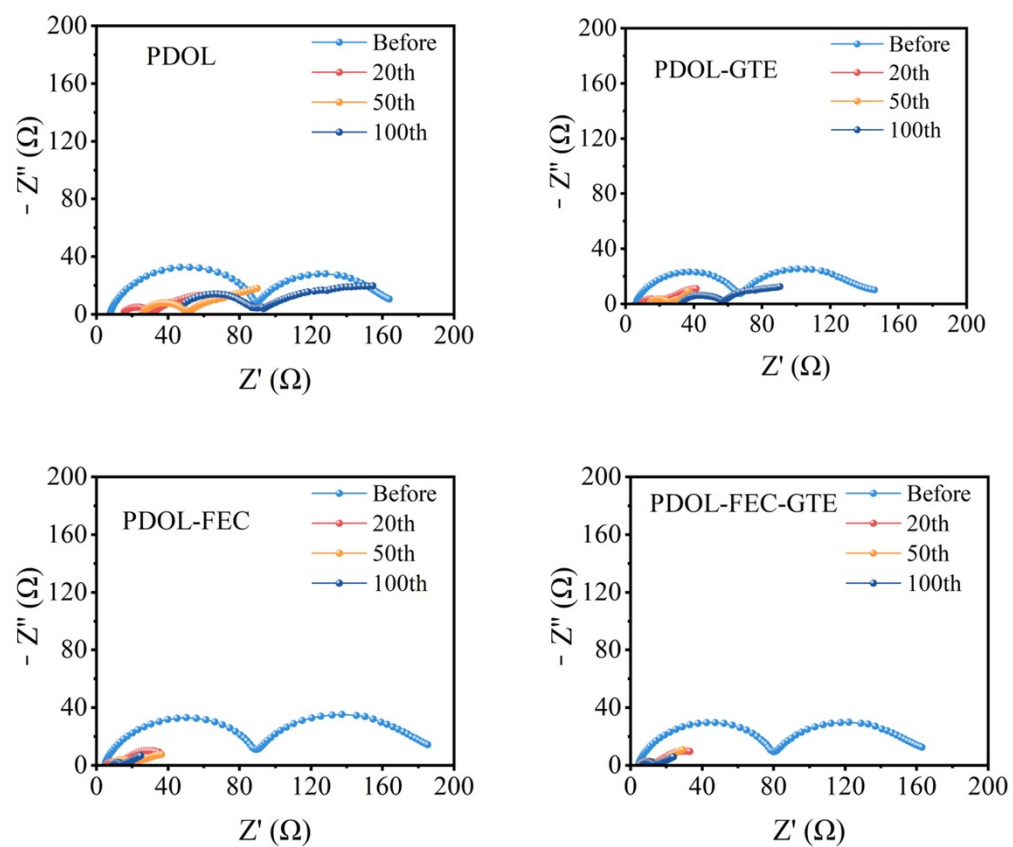

Fig. S9 The EIS plots of the cycled Li||Li cells with the (a) PDOL, (b) PDOL-GTE, (c) PDOL-FEC and (d) PDOL-FEC-GTE GPE sheet.

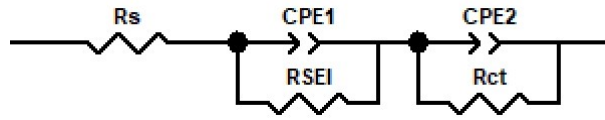

Fig S10 Equivalent circuit for fitting Nyquist plots of Li||Li symmetric cells.

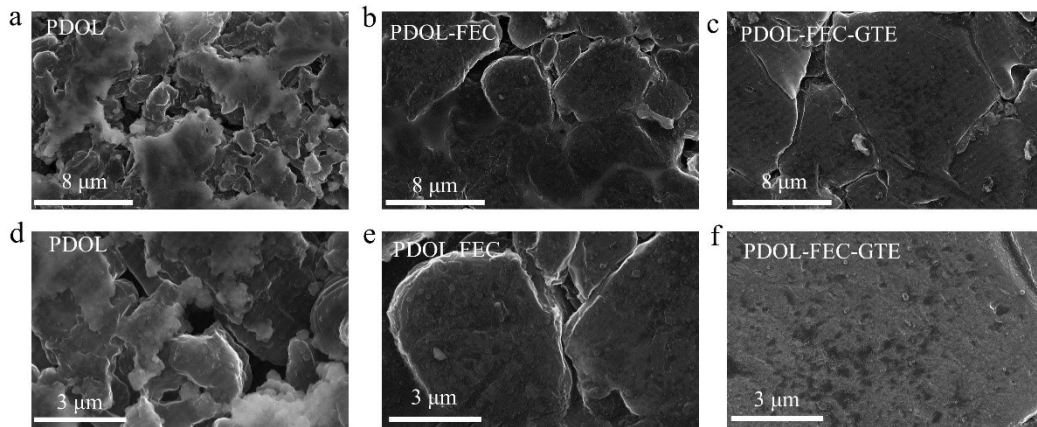

Fig. S11 Top-view SEM images of Li metal anodes after 100 cycles with (a, d)PDOL, (b, e)PDOL-FEC, (c, f)PDOL-FEC-GTE.

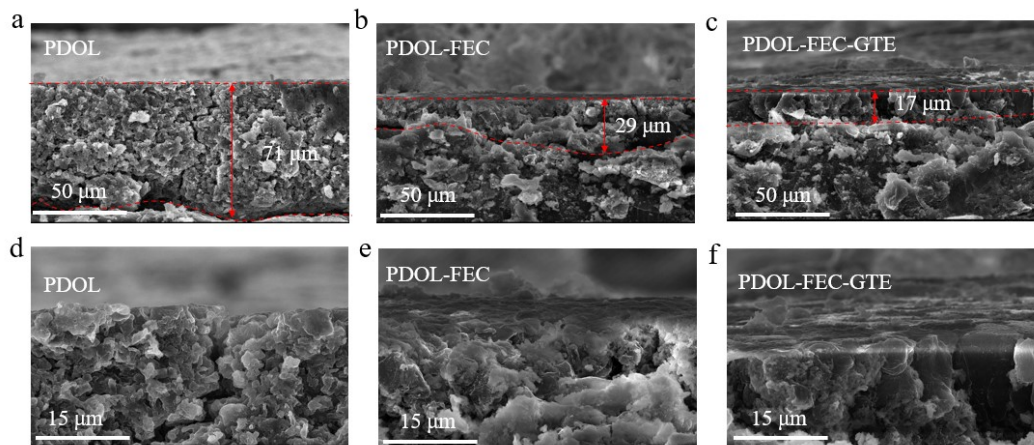

Fig. S12 Cross-sectional SEM images of Li metal anodes after 100 cycles with (a and d)PDOL, (b and e)PDOL-FEC, (c and f)PDOL-FEC-GTE.

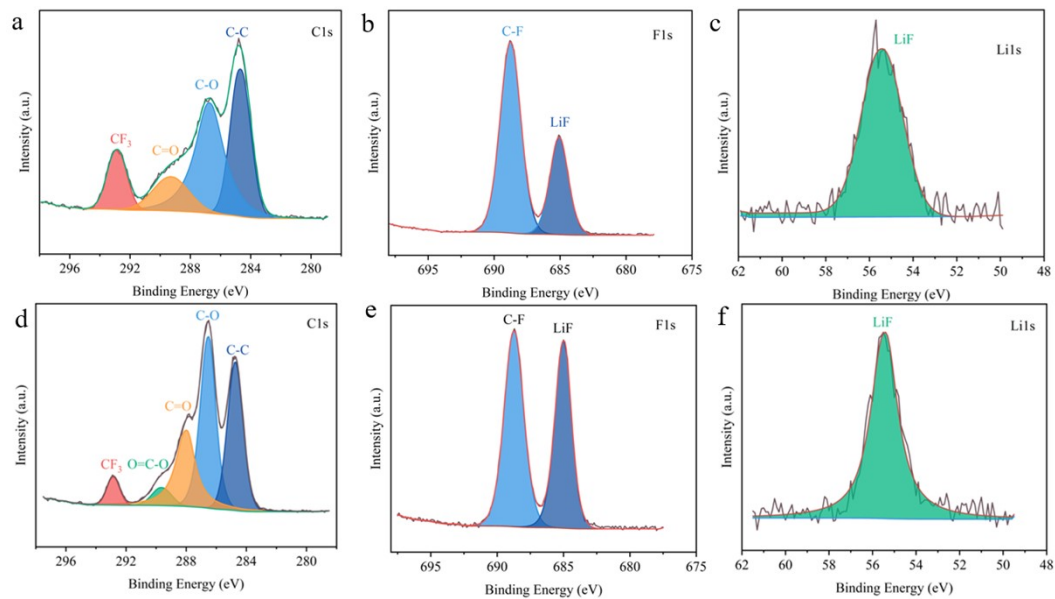

Fig. S13 XPS spectra (C 1s, F 1s and Li 1s spectra) of the Li metal surface from the cycled Li||Li cells after 50 h at 1 mA cm<sup>-2</sup> for 1 mA h cm<sup>-2</sup>: (a, b and c) LE cell and (d, e and f) GPE cell (PDOL-FEC-GTE)

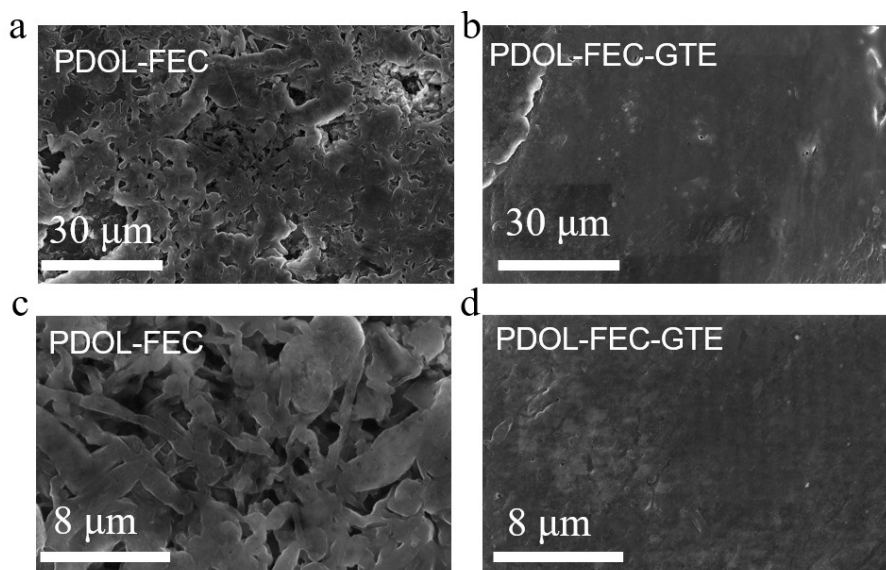

Fig. S14 the SEM images of Li metal surface of (a and c)LFP|PDOL-FEC|Li and (b and d)LFP|PDOL-FEC-GTE|Li after 60 cycles

Table S1 Effect of different polymerization conditions on ionic conductivity

| Name        | GTE   | LiDFOB | Resistance     | Ionic conductivity   |
|-------------|-------|--------|----------------|----------------------|
| PDOL-5GTE-5 | 5 wt% | 0.5 M  | 175.6 $\Omega$ | $8.1 \times 10^{-6}$ |
| PDOL-5GTE-2 | 5 wt% | 0.2 M  | 79.8 $\Omega$  | $1.8 \times 10^{-5}$ |
| PDOL-2GTE-5 | 2 wt% | 0.5 M  | 85.4 $\Omega$  | $1.7 \times 10^{-5}$ |
| PDOL-2GTE-2 | 2 wt% | 0.2 M  | 6.6 $\Omega$   | $2.2 \times 10^{-4}$ |

Table S2 The fitted EIS parameters of Li|PDOL|Li , Li|PDOL-GTE|Li, Li|PDOL-FEC|Li and Li|PDOL-FEC-GTE|Li cells

|                    |        | $R_s$ | $R_{SEI}$ | $R_{ct}$ |
|--------------------|--------|-------|-----------|----------|
| Li PDOL Li         | Before | 7.563 | 82.12     | 74.78    |
|                    | 20th   | 14.24 | 16.72     | 53.06    |
|                    | 50th   | 25.85 | 22.83     | 88.45    |
|                    | 100th  | 44.26 | 42.43     | 108.1    |
| Li PDOL-GTE Li     | Before | 5.998 | 59.88     | 77.75    |
|                    | 20th   | 9.451 | 9.855     | 57.45    |
|                    | 50th   | 14.03 | 12.01     | 10.11    |
|                    | 100th  | 31.95 | 25.19     | 31.04    |
| Li PDOL-FEC Li     | Before | 5.611 | 82.21     | 81.93    |
|                    | 20th   | 6.675 | 7.182     | 30.7     |
|                    | 50th   | 10.57 | 6.992     | 12.55    |
|                    | 100th  | 9.629 | 5.914     | 10.7     |
| Li PDOL-FEC-GTE Li | Before | 4.408 | 74.82     | 85.04    |
|                    | 20th   | 5.46  | 7.748     | 34.65    |
|                    | 50th   | 5.842 | 8.339     | 14.35    |
|                    | 100th  | 6.507 | 6.904     | 12.76    |
